# Supplementary material
Source: publisher figshare collection journal article supplement (https://acs.figshare.com/ndownloader/files/7704778)
Supplement: Supplementary file 1 [file 7704778]

## **SUPPORTING INFORMATION**

# **High Numerical Aperture Hexagonal Stacked Ring-Based Bidirectional Flexible Polymer Microlens Array**

Rajib Ahmed,<sup>1,\*</sup> Ali K. Yetisen,<sup>2,3</sup> and Haider Butt<sup>1,\*</sup>

<sup>1</sup>Microengineering and Nanotechnology Laboratory, School of Mechanical Engineering,  
University of Birmingham, Birmingham B15 2TT, United Kingdom

<sup>2</sup>Harvard Medical School and Division of Biomedical Engineering, Brigham and Women's  
Hospital,, 65 Lansdowne St., Cambridge, Massachusetts 02139, USA

<sup>3</sup>Harvard-MIT Division of Health Sciences and Technology, Massachusetts Institute of  
Technology, 65 Landsdowne St., Cambridge, MA, 02139, USA

\*Email: h.butt@bham.ac.uk (HB), a.rajib@osamember.org (RA)

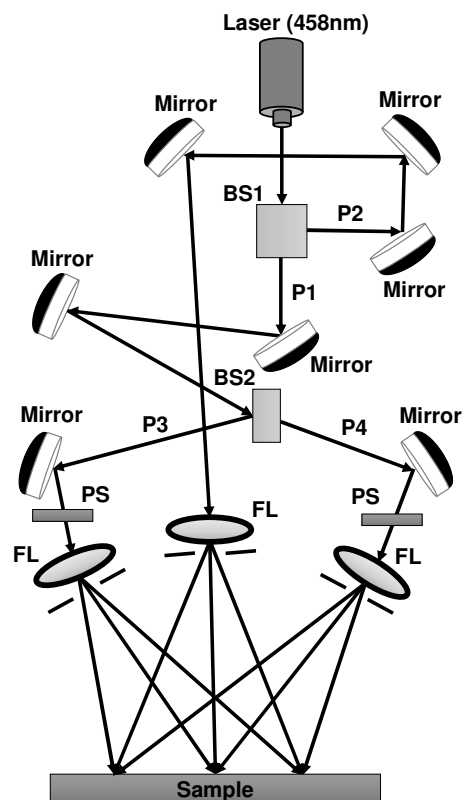

**Figure S1.** Laser exposers set-up for the SMLAs.

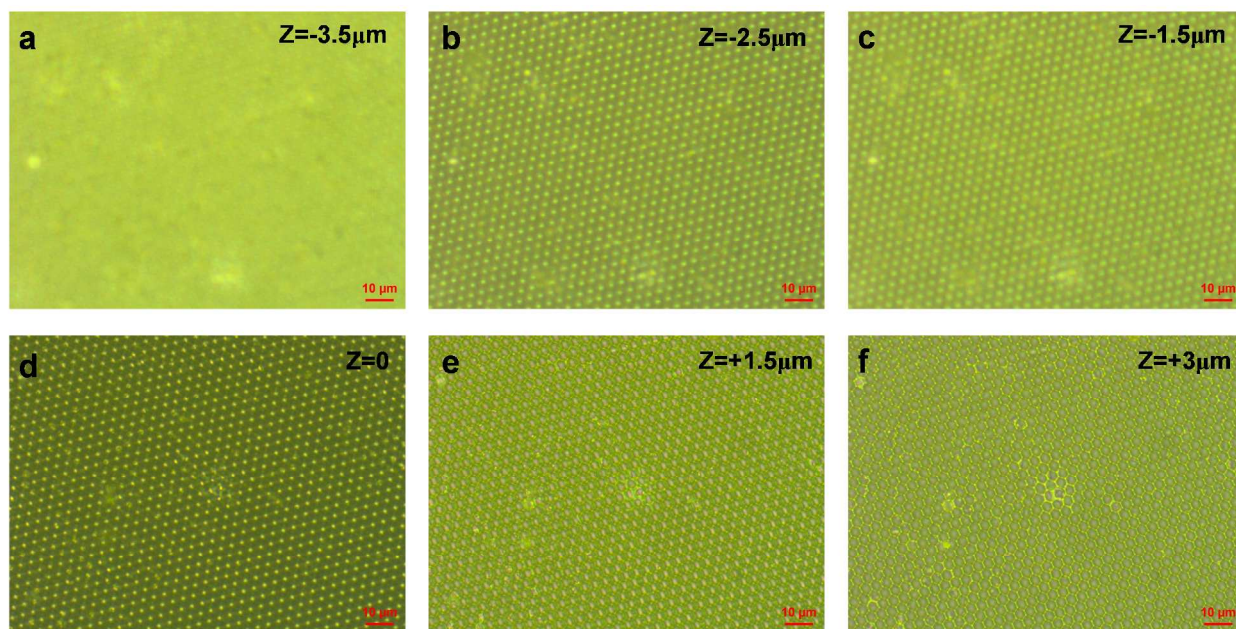

**Figure S2.** Light focusing property of SMLAs through optical microscope at different distances along the z-axis.

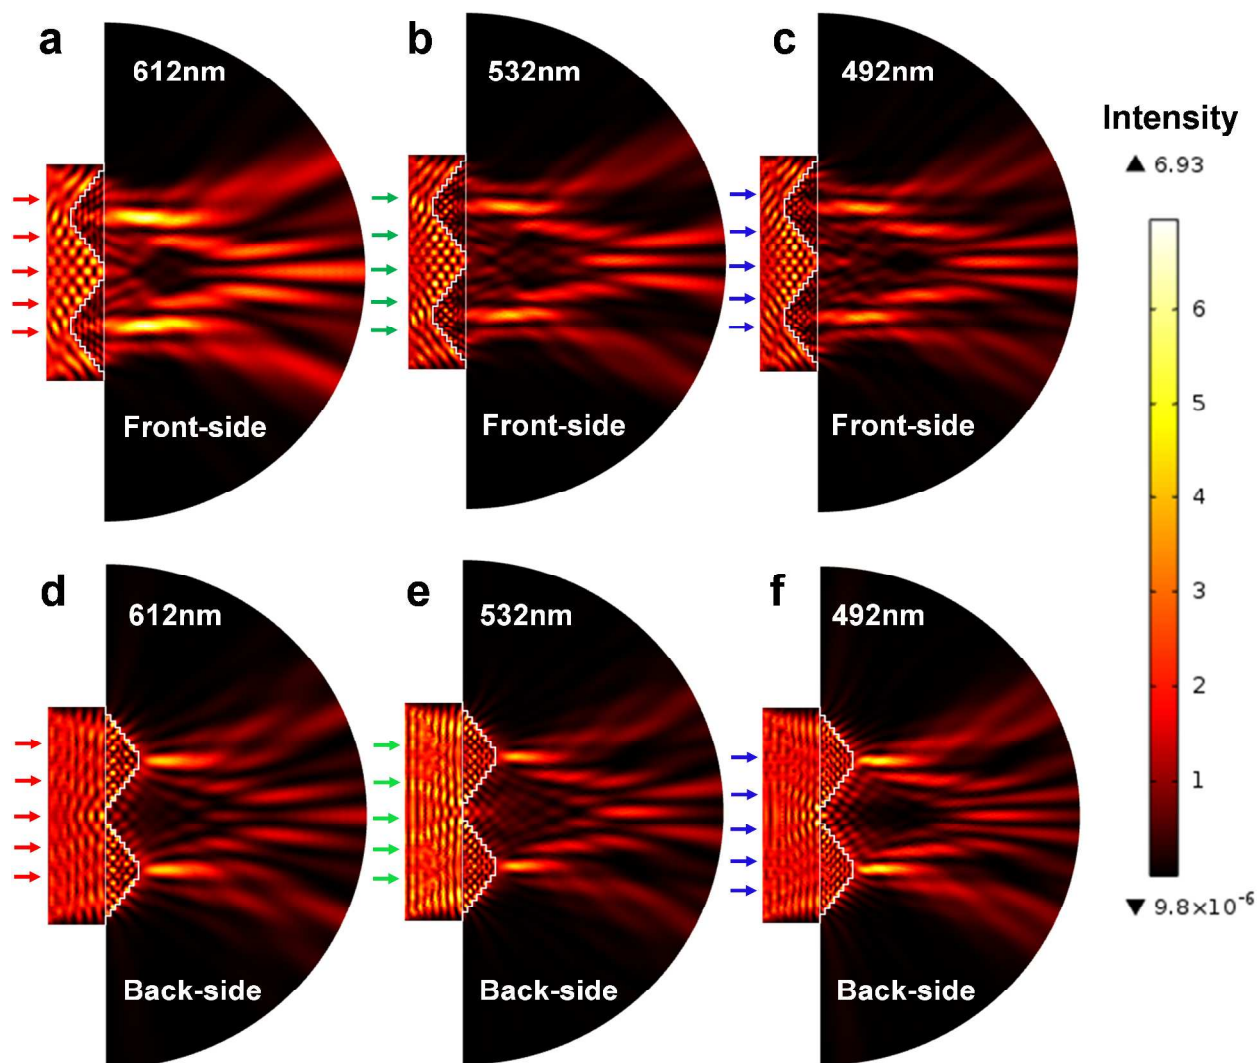

**Figure S3:** Bidirectional focusing property of SMLAs. (a-c) Electric field intensity for the red, green, and blue light illumination at the front-side and (d-e) Back-side.

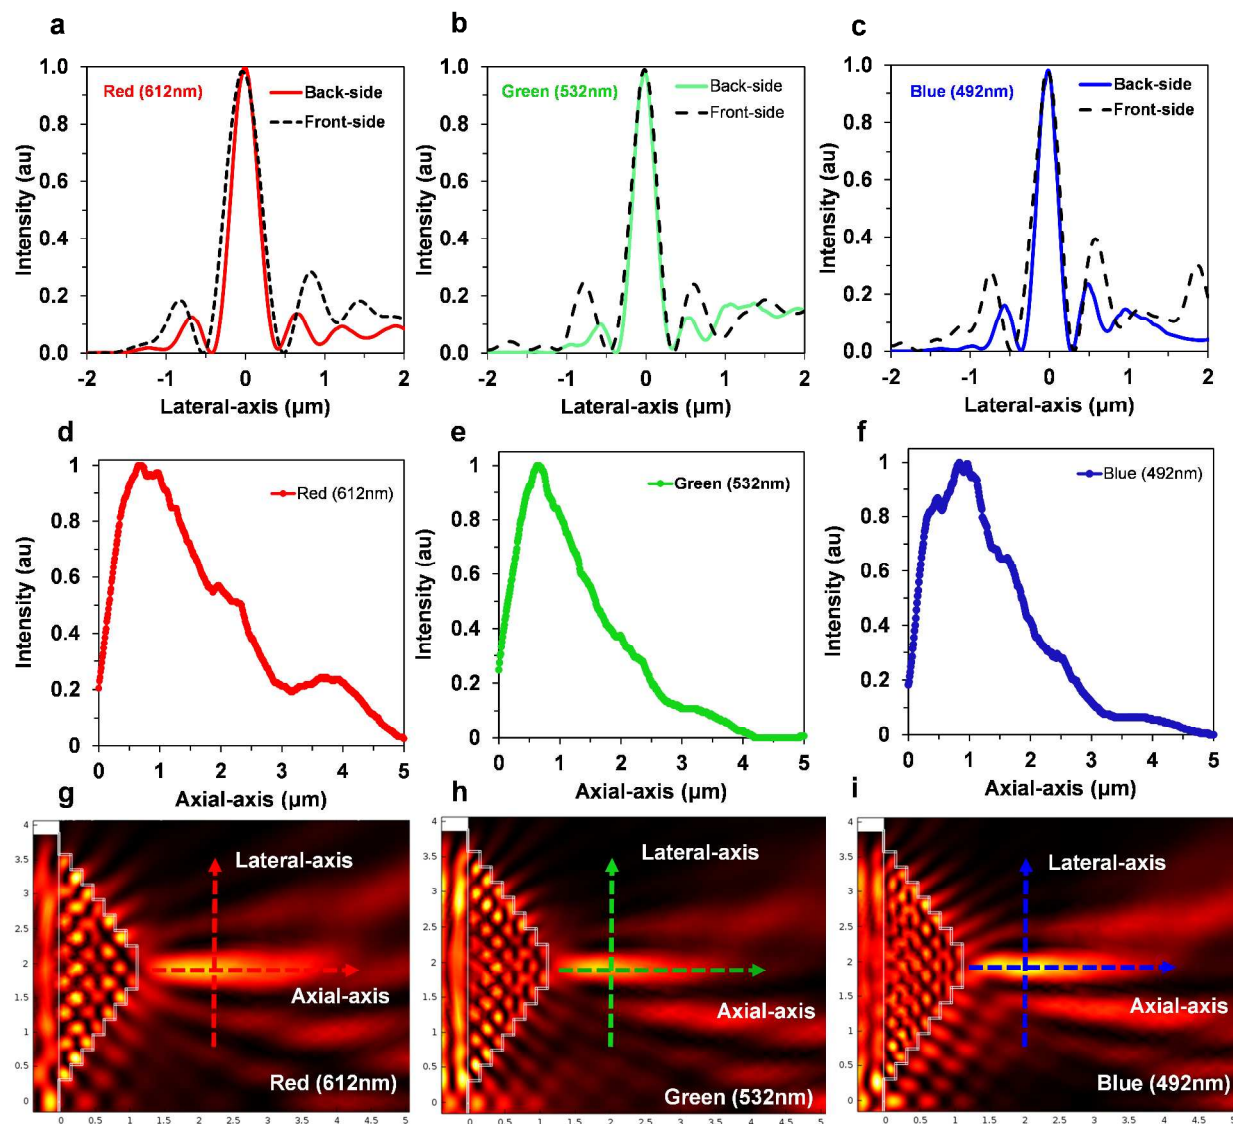

**Figure S4:** Optical characterization of SMLAs. Focused optical intensity along (a-c) lateral-axis (d-f) the back-side for the red, green and blue light illumination at the back-side. (g-h) Magnified field intensity for monochromatic light illumination at the backside.
